# Supplementary material for: Feeding cats with chronic kidney disease food supplemented with betaine and prebiotics increases total body mass and reduces uremic toxins
Source: PLoS One. 2022 May 24;17(5):e0268624. doi: 10.1371/journal.pone.0268624 (PMC9129019; doi:10.1371/journal.pone.0268624)
Supplement: S4 Table — Red and green shaded cells indicate p≤0.05 (red indicates that the mean values are significantly higher for that comparison; green values significantly lower). Light red and light green shaded cells indicate 0.05<p<0.10 (light red indicates that the mean values trend higher for that comparison; light green values trend lower). For the ANOVA, blue-shaded cells indicate p≤0.05; light blue-shaded cells indicate 0.05<p<0.10. (XLSX) [file pone.0268624.s004.xlsx]

## Sheet: Sheet1
Feeding cats with kidney disease food supplemented with prebiotics and betaine increases total body mass and reduces uremic toxins
Jean A. Hall; Dennis E. Jewell; Eden Ephraim
S4 Table. Heat Map of Statistically Significant Fecal Biochemicals from CKD Cats Profiled in this Study. Red and green shaded cells indicate p≤0.05 (red indicates that the mean values are significantly higher for that comparison; green values significantly lower). Light red and light green shaded cells indicate 0.05<p<0.10 (light red indicates that the mean values trend higher for that comparison…
Super Pathway	Sub Pathway	Biochemical Name	Fold Change	Statistical Values		Mean Values
			Test	Test		LS_CTRL	LS_TEST
				Ctrl
			Ctrl	p-value	q-value
Amino Acid	Histidine Metabolism	histamine	1.41	0.0379	0.6227	0.1456	0.2058
Amino Acid	Histidine Metabolism	N-acetylhistamine	1.38	0.0092	0.5515	0.3073	0.4234
Amino Acid	Phenylalanine and Tyrosine Metabolism	4-hydroxyphenylacetate	3.28	0.0053	0.5515	0.5226	1.7144
Amino Acid	Tryptophan Metabolism	indolelactate	1.95	0.0439	0.6227	0.7736	1.5063
Amino Acid	Tryptophan Metabolism	thioproline	1.55	0.039	0.6227	0.7862	1.2211
Amino Acid	Methionine, Cysteine, SAM and Taurine Metabolism	N-acetylcysteine	2.04	0.0188	0.5515	0.585	1.1944
Amino Acid	Urea cycle; Arginine and Proline Metabolism	N-delta-acetylornithine	1.46	0.014	0.5515	1.0388	1.5124
Amino Acid	Glutathione Metabolism	cysteinylglycine	1.79	0.011	0.5515	0.7754	1.3845
Peptide	Gamma-glutamyl Amino Acid	gamma-glutamylalanine	0.6	0.0159	0.5515	1.3927	0.8341
Peptide	Gamma-glutamyl Amino Acid	gamma-glutamylmethionine	0.71	0.0479	0.6227	1.2418	0.8856
Peptide	Dipeptide Derivative	carnosine	1.34	0.0002	0.0382	0.9007	1.2057
Peptide	Dipeptide Derivative	anserine	1.37	0.0276	0.5869	0.846	1.1619
Carbohydrate	Aminosugar Metabolism	N-acetylglucosamine 6-sulfate	3.45	0.0228	0.5515	0.5492	1.8933
Energy	TCA Cycle	fumarate	0.55	0.0496	0.6227	1.5396	0.8465
Lipid	Polyunsaturated Fatty Acid (n3 and n6)	dihomo-linolenate (20:3n3 or n6)	0.56	0.0083	0.5515	1.3347	0.7469
Lipid	Fatty Acid, Dicarboxylate	2-hydroxyadipate	1.46	1.44e-06	0.0007	0.7009	1.0268
Lipid	Fatty Acid, Dicarboxylate	sebacate (decanedioate)	1.25	0.0398	0.6227	0.9922	1.2355
Lipid	Lysolipid	1-stearoyl-GPC (18:0)	1.54	0.0039	0.5515	0.8935	1.3721
Lipid	Lysolipid	1-stearoyl-GPE (18:0)	1.6	0.023	0.5515	0.8255	1.3229
Lipid	Glycerolipid Metabolism	glycerophosphoglycerol	1.9	0.0245	0.5515	0.5799	1.1016
Lipid	Monoacylglycerol	2-palmitoylglycerol (16:0)	0.63	0.0244	0.5515	0.9483	0.5934
Lipid	Diacylglycerol	oleoyl-arachidonoyl-glycerol (18:1/20:4) [2]*	1.36	0.0452	0.6227	0.9246	1.2589
Lipid	Diacylglycerol	stearoyl-linoleoyl-glycerol (18:0/18:2) [2]*	1.59	0.0176	0.5515	0.6997	1.1134
Lipid	Sphingolipid Metabolism	N-butyroyl-sphingosine (d18:1/4:0)	0.51	0.022	0.5515	0.9995	0.5075
Lipid	Glycolipid Metabolism	1,2-dilinoleoyl-galactosylglycerol (18:2/18:2)*	1.08	0.0288	0.5869	0.9191	0.995
Nucleotide	Pyrimidine Metabolism, Uracil containing	2'-deoxyuridine	1.79	0.019	0.5515	0.8765	1.5668
Nucleotide	Pyrimidine Metabolism, Thymine containing	thymidine	1.63	0.0088	0.5515	0.8826	1.4379
Nucleotide	Pyrimidine Metabolism, Thymine containing	thymine	1.48	0.045	0.6227	1.0532	1.557
Xenobiotics	Benzoate Metabolism	2,4,6-trihydroxybenzoate	1.24	0.0298	0.5869	0.9369	1.1587
Xenobiotics	Food Component/Plant	daidzein	1.54	0.0479	0.6227	0.6202	0.9582
Xenobiotics	Food Component/Plant	syringic acid	1.73	0.0177	0.5515	0.6559	1.1366
